# Supplementary material
Source: PubMed Central journal article supplement (PMC3889622)
Supplement: JB.00651-13_zjb999092924so1.pdf [file JB.00651-13_zjb999092924so1.pdf]

Figure S1

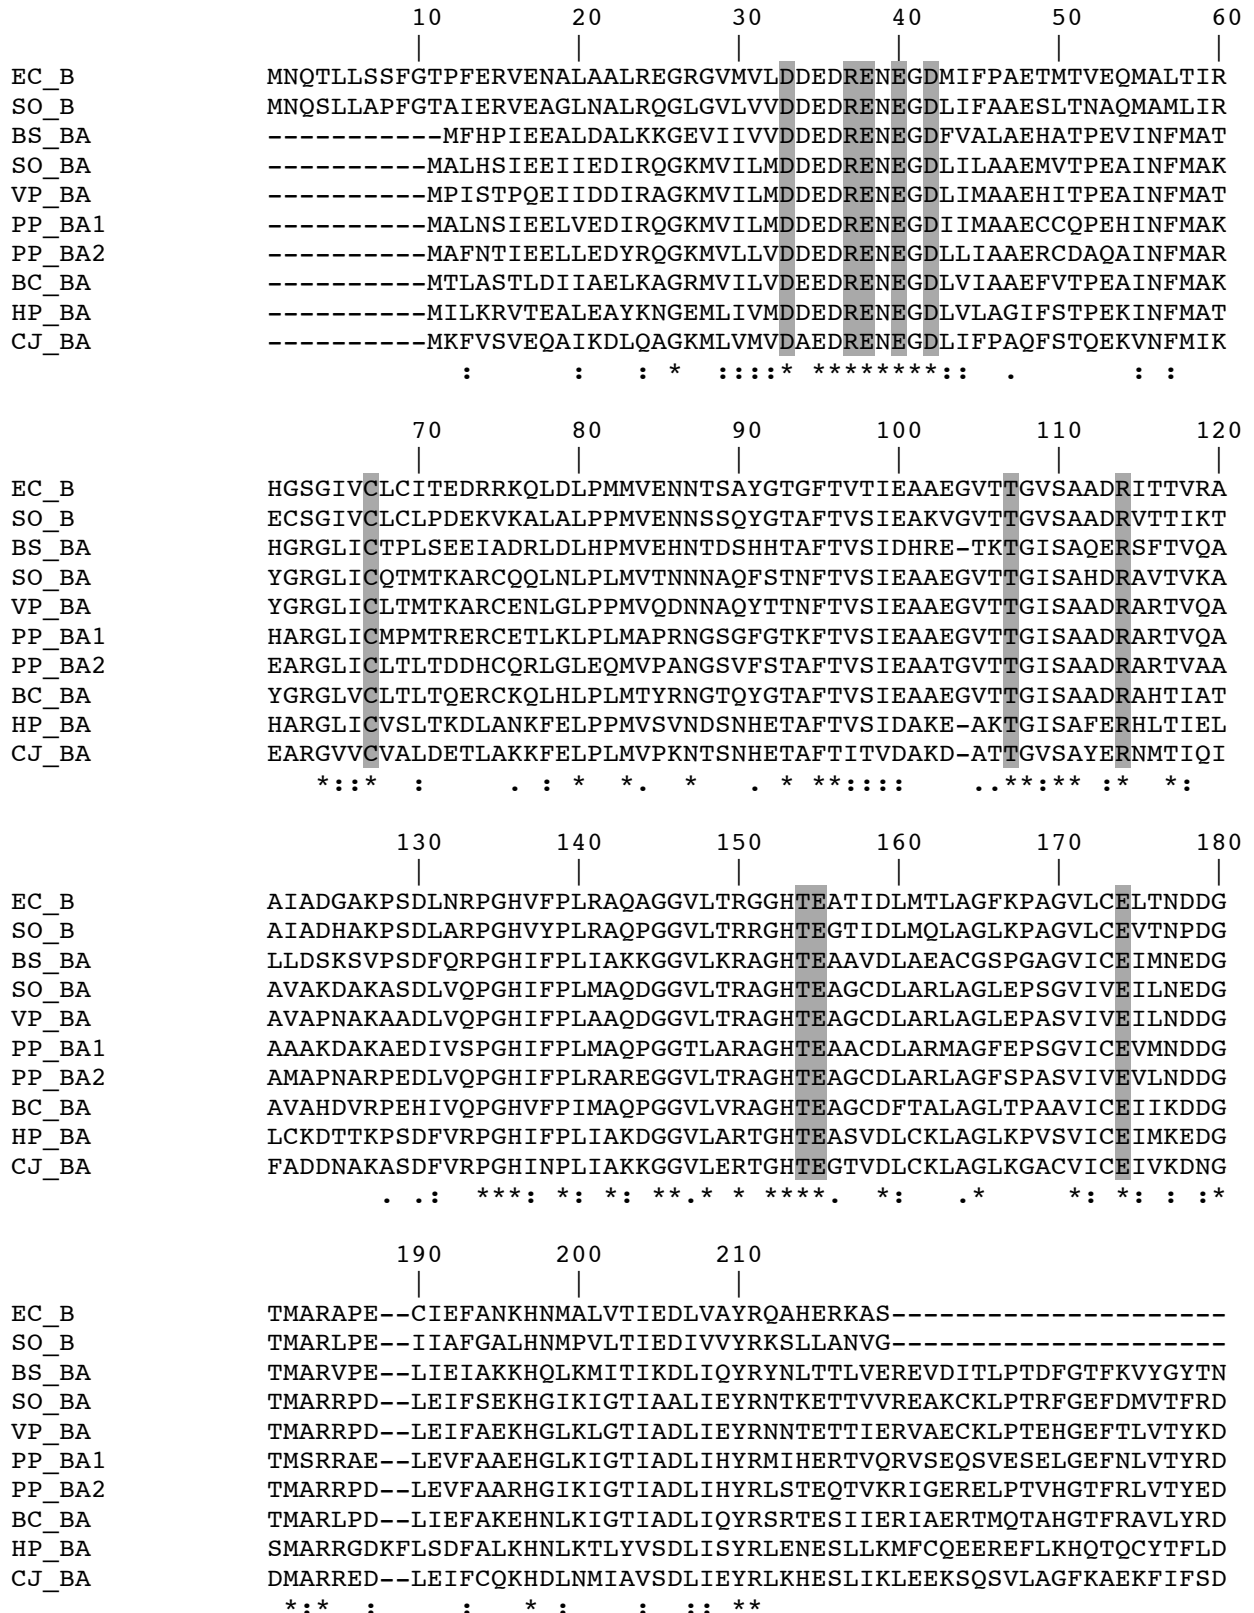

**Figure S1. Alignment of DHBP synthase domains from *Proteobacteria*.** (A) ClustalW alignment of the *E. coli* and MR-1 RibB sequences and the RibBA-NTD sequences of select *Proteobacteria*. Based on the published crystal structure of the *E. coli* RibB (1), residues that participate in the catalytic mechanism are boxed in dark grey.

**Reference:**

1. Liao DI, Calabrese JC, Wawrzak Z, Viitanen PV, & Jordan DB (2001) Crystal structure of 3,4-dihydroxy-2-butanone 4-phosphate synthase of riboflavin biosynthesis. *Structure* 9(1):11-18.

## Figure S2

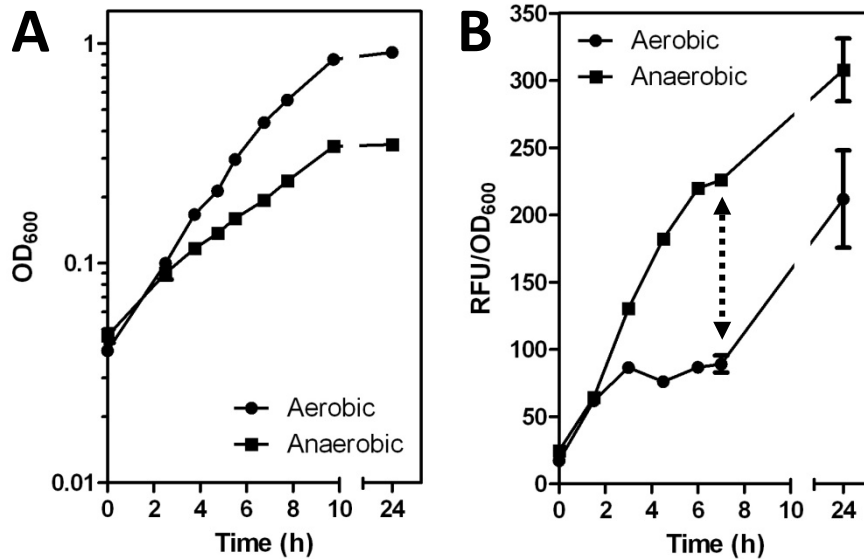

**Figure S2. Growth of MR-1 and accumulation of extracellular flavins in the presence and absence of oxygen.** (A) Optical density ( $OD_{600}$ ) of wild-type MR-1 grown aerobically (●) or anaerobically (■) in SBM. (B) Fluorescence intensity (in RFU) normalized to optical density from culture supernatants of wild-type MR-1 grown aerobically (●) or anaerobically (■) in SBM. The time point used for Figure 2 is indicated with a dotted arrow. Reported values for both A and B are the averages of three independent experiments and error bars represent the standard error of the mean (SEM).

**Table S1. Strains and plasmids used in this study<sup>1</sup>.**

| <b>Strain</b>                | <b>Description</b>                               | <b>Source</b> |
|------------------------------|--------------------------------------------------|---------------|
| <i>Shewanella oneidensis</i> |                                                  |               |
| MR-1 (JG274)                 | Wild-type MR-1                                   | (1)           |
| JG1604                       | $\Delta ribB$                                    | This work     |
| JG1667                       | $\Delta ribBX$                                   | This work     |
| JG2240                       | $\Delta ribE-1$                                  | This work     |
| JG2241                       | $\Delta ribE-2$                                  | This work     |
| JG168                        | MR-1 + pBBR1MCS-2                                | This work     |
| JG1598                       | MR-1 + pBBR1MCS-2 <i>ribA</i>                    | This work     |
| JG1599                       | MR-1 + pBBR1MCS-2 <i>ribB</i>                    | This work     |
| JG1775                       | MR-1 + pBBR1MCS-2 <i>ribBX</i>                   | This work     |
| JG1995                       | MR-1 + pBBR1MCS-2 <i>ribBA<sub>BS</sub></i>      | This work     |
| JG1818                       | MR-1 + pBBR1MCS-2 <i>ribBX-NTD</i>               | This work     |
| JG1819                       | MR-1 + pBBR1MCS-2 <i>ribBX-CTD</i>               | This work     |
| <i>Escherichia coli</i>      |                                                  |               |
| UQ950                        | DH5 $\alpha$ $\lambda$ pir cloning strain        | (2)           |
| WM3064                       | Donor strain for conjugation                     | (2)           |
| 1100-2                       | Parent strain of the riboflavin auxotrophs       | (3)           |
| BSV11                        | 1100-2 <i>ribB11::Tn5</i>                        | (3)           |
| BSV18                        | 1100-2 <i>ribA18::Tn5</i>                        | (3)           |
| BSV23                        | 1100-2 <i>ribC23::Tn5 (ribE::Tn5)</i>            | (3)           |
| JG1725                       | BSV11 + pBBR1MCS-5                               | This work     |
| JG1908                       | BSV11 + pBBR1MCS-5 <i>ribA</i>                   | This work     |
| JG1726                       | BSV11 + pBBR1MCS-5 <i>ribB</i>                   | This work     |
| JG1727                       | BSV11 + pBBR1MCS-5 <i>ribBX</i>                  | This work     |
| JG1909                       | BSV11 + pBBR1MCS-5 <i>ribBX-NTD</i>              | This work     |
| JG1910                       | BSV11 + pBBR1MCS-5 <i>ribBX-CTD</i>              | This work     |
| JG1997                       | BSV11 + pBBR1MCS-5 <i>ribBA<sub>BS</sub></i>     | This work     |
| JG2213                       | BSV11 + pBBR1MCS-5 <i>ribBA<sub>BS</sub>-NTD</i> | This work     |
| JG2214                       | BSV11 + pBBR1MCS-5 <i>ribBA<sub>BS</sub>-CTD</i> | This work     |
| JG2537                       | BSV11 + pBBR1MCS-5 VP_0618                       | This work     |
| JG2538                       | BSV11 + pBBR1MCS-5 PP_0516                       | This work     |
| JG2539                       | BSV11 + pBBR1MCS-5 PP_3813                       | This work     |
| JG2540                       | BSV11 + pBBR1MCS-5 BcenP_01000846                | This work     |
| JG1722                       | BSV18 + pBBR1MCS-5                               | This work     |
| JG1723                       | BSV18 + pBBR1MCS-5 <i>ribA</i>                   | This work     |
| JG1911                       | BSV18 + pBBR1MCS-5 <i>ribB</i>                   | This work     |
| JG1724                       | BSV18 + pBBR1MCS-5 <i>ribBX</i>                  | This work     |
| JG1912                       | BSV18 + pBBR1MCS-5 <i>ribBX-NTD</i>              | This work     |
| JG1913                       | BSV18 + pBBR1MCS-5 <i>ribBX-CTD</i>              | This work     |
| JG1998                       | BSV18 + pBBR1MCS-5 <i>ribBA<sub>BS</sub></i>     | This work     |
| JG2215                       | BSV18 + pBBR1MCS-5 <i>ribBA<sub>BS</sub>-NTD</i> | This work     |
| JG2216                       | BSV18 + pBBR1MCS-5 <i>ribBA<sub>BS</sub>-CTD</i> | This work     |
| JG2543                       | BSV18 + pBBR1MCS-5 VP_0618                       | This work     |
| JG2544                       | BSV18 + pBBR1MCS-5 PP_0516                       | This work     |

|                 |                                                             |           |
|-----------------|-------------------------------------------------------------|-----------|
| JG2545          | BSV18 + pBBR1MCS-5 PP_3813                                  | This work |
| JG2546          | BSV18 + pBBR1MCS-5 BcenP_01000846                           | This work |
| JG1905          | BSV23 + pBBR1MCS-5                                          | This work |
| JG1903          | BSV23 + pBBR1MCS-5 <i>ribE-1</i>                            | This work |
| JG1904          | BSV23 + pBBR1MCS-5 <i>ribE-2</i>                            | This work |
| SU101           | Mono-hybrid <i>lacZ</i> reporter stain                      | (4)       |
| SU202           | Two-hybrid <i>lacZ</i> reporter stain                       | (4)       |
| SU101 Vec       | SU101 + pSR658                                              | (4)       |
| SU101 LexA-CAT  | SU101 + pDD506                                              | (4)       |
| JG2414          | SU101 + pSR658 <i>ribA</i>                                  | This work |
| JG2415          | SU101 + pSR658 <i>ribB</i>                                  | This work |
| JG2416          | SU101 + pSR658 <i>ribBX</i>                                 | This work |
| JG2417          | SU101 + pSR658 <i>ribBX-NTD</i>                             | This work |
| JG2418          | SU101 + pSR658 <i>ribBX-CTD</i>                             | This work |
| JG2419          | SU101 + pSR658 <i>ribBA<sub>BS</sub></i>                    | This work |
| SU202 Vec1 Vec2 | SU202 + pSR658 and pSR659                                   | (4)       |
| SU202 Jun/Fos   | SU202 + pMS604 and pDP804                                   | (4)       |
| JG2420          | SU202 + pSR658 <i>ribBX-CTD</i> and pSR659                  | This work |
| JG2421          | SU202 + pSR658 <i>ribBX-CTD</i> and pSR659 <i>ribA</i>      | This work |
| JG2422          | SU202 + pSR658 <i>ribBX-CTD</i> and pSR659 <i>ribB</i>      | This work |
| JG2423          | SU202 + pSR658 <i>ribBX-CTD</i> and pSR659 <i>ribBX</i>     | This work |
| JG2424          | SU202 + pSR658 <i>ribBX-CTD</i> and pSR659 <i>ribBX-NTD</i> | This work |
| JG2425          | SU202 + pSR658 <i>ribBX-CTD</i> and pSR659 <i>ribBX-CTD</i> | This work |

| Plasmid                                  | Description                                             | Source    |
|------------------------------------------|---------------------------------------------------------|-----------|
| pSMV3 <i>ribA</i>                        | Deletion vector for <i>ribA</i>                         | This work |
| pSMV3 <i>ribB</i>                        | Deletion vector for <i>ribB</i>                         | This work |
| pSMV3 <i>ribBX</i>                       | Deletion vector for <i>ribBX</i>                        | This work |
| pSMV3 <i>ribE-1</i>                      | Deletion vector for <i>ribE-1</i>                       | This work |
| pSMV3 <i>ribE-2</i>                      | Deletion vector for <i>ribE-1</i>                       | This work |
| pBBR1MCS-2                               | Broad host range vector, Km                             | (5)       |
| pBBR1MCS-2 <i>ribA</i>                   | <i>ribA</i> from MR-1                                   | This work |
| pBBR1MCS-2 <i>ribB</i>                   | <i>ribB</i> from MR-1                                   | This work |
| pBBR1MCS-2 <i>ribBX</i>                  | <i>ribBX</i> from MR-1                                  | This work |
| pBBR1MCS-2 <i>ribBA<sub>BS</sub></i>     | <i>ribBA</i> from <i>Bacillus subtilis subtilis</i> 168 | This work |
| pBBR1MCS-2 <i>ribBX-NTD</i>              | nt 1 - 621 of <i>ribBX</i> from MR-1                    | This work |
| pBBR1MCS-2 <i>ribBX-CTD</i>              | nt 540 - 1101 of <i>ribBX</i> from MR-1                 | This work |
| pBBR1MCS-5                               | Broad host range vector, Gm                             | (5)       |
| pBBR1MCS-5 <i>ribA</i>                   | <i>ribA</i> from MR-1                                   | This work |
| pBBR1MCS-5 <i>ribB</i>                   | <i>ribB</i> from MR-1                                   | This work |
| pBBR1MCS-5 <i>ribBX</i>                  | <i>ribBX</i> from MR-1                                  | This work |
| pBBR1MCS-5 <i>ribBX-NTD</i>              | nt 1 - 621 of <i>ribBX</i> from MR-1                    | This work |
| pBBR1MCS-5 <i>ribBX-CTD</i>              | nt 540 - 1101 of <i>ribBX</i> from MR-1                 | This work |
| pBBR1MCS-5 <i>ribBA<sub>BS</sub></i>     | <i>ribBA</i> from <i>B. subtilis subtilis</i> 168       | This work |
| pBBR1MCS-5 <i>ribBA<sub>BS</sub>-NTD</i> | <i>ribBA</i> from <i>B. subtilis subtilis</i> 168       | This work |
| pBBR1MCS-5 <i>ribBA<sub>BS</sub>-CTD</i> | <i>ribBA</i> from <i>B. subtilis subtilis</i> 168       | This work |
| pBBR1MCS-5 <i>ribE-1</i>                 | <i>ribE-1</i> from MR-1                                 | This work |
| pBBR1MCS-5 <i>ribE-2</i>                 | <i>ribE-2</i> from MR-1                                 | This work |

|                                  |                                                    |           |
|----------------------------------|----------------------------------------------------|-----------|
| pBBR1MCS-5 VP_0618               | VP_0618 from <i>Vibrio parahaemolyticus</i> RIMD   | This work |
| pBBR1MCS-5 PP_0516               | PP_0516 from <i>Pseudomonas putida</i> KT2440      | This work |
| pBBR1MCS-5 PP_3813               | PP_3813 from <i>P. putida</i> KT2440               | This work |
| pBBR1MCS-5 BcenP_01000846        | PP_0516 from <i>Burkholderia cenocepacia</i> PC184 | This work |
| pSR658                           | LexA fusions for mono- and two-hybrid              | (4)       |
| pSR659                           | LexA fusions for two-hybrid                        | (4)       |
| pDD506                           | pSR658 expressing the CAT-LexA fusion              | (4)       |
| pMS604                           | pSR658 expressing the Jun-LexA fusion              | (4)       |
| pDP804                           | pSR659 expressing the Fos-LexA fusion              | (4)       |
| pSR658 <i>ribA</i>               | <i>lexA-ribA</i> from MR-1                         | This work |
| pSR658 <i>ribB</i>               | <i>lexA-ribB</i> from MR-1                         | This work |
| pSR658 <i>ribBX</i>              | <i>lexA-ribBX</i> from MR-1                        | This work |
| pSR658 <i>ribBX-NTD</i>          | <i>lexA-ribBX-NTD</i> from MR-1                    | This work |
| pSR658 <i>ribBX-CTD</i>          | <i>lexA-ribBX-CTD</i> from MR-1                    | This work |
| pSR658 <i>ribBA<sub>BS</sub></i> | <i>lexA-ribBA<sub>BS</sub></i> from MR-1           | This work |
| pSR659 <i>ribA</i>               | <i>lexA-ribA</i> from MR-1                         | This work |
| pSR659 <i>ribB</i>               | <i>lexA-ribB</i> from MR-1                         | This work |
| pSR659 <i>ribBX</i>              | <i>lexA-ribBX</i> from MR-1                        | This work |
| pSR659 <i>ribBX-NTD</i>          | <i>lexA-ribBX-NTD</i> from MR-1                    | This work |
| pSR659 <i>ribBX-CTD</i>          | <i>lexA-ribBX-CTD</i> from MR-1                    | This work |

<sup>1</sup>To avoid confusion the gene in MR-1 formerly named *ribBA* (SO\_3467) is referred to by the new name *ribBX* throughout this table.

1. C. R. Myers, K. H. Nealson, Bacterial manganese reduction and growth with manganese oxide as the sole electron acceptor. *Science* **240**, 1319 (Jun, 1988).
2. C. W. Saltikov, D. K. Newman, Genetic identification of a respiratory arsenate reductase. *Proc Natl Acad Sci U S A* **100**, 10983 (Sep, 2003).
3. S. V. Bandrin, P. M. Rabinovich, A. I. Stepanov, [3 linkage groups of the genes of riboflavin biosynthesis in *Escherichia coli*]. *Genetika* **19**, 1419 (Sep, 1983).
4. D. A. Daines, M. Granger-Schnarr, M. Dimitrova, R. P. Silver, Use of LexA-based system to identify protein-protein interactions in vivo. *Methods Enzymol* **358**, 153 (2002).
5. M. E. Kovach *et al.*, Four new derivatives of the broad-host-range cloning vector pBBR1MCS, carrying different antibiotic-resistance cassettes. *Gene* **166**, 175 (Dec, 1995).

**Table S2. Oligonucleotide primers used in this study.**

| <b>Primer</b>                                                                                         | <b>Sequence*</b>                                                      |
|-------------------------------------------------------------------------------------------------------|-----------------------------------------------------------------------|
| <u>Deletion primer sets for cloning up and downstream flanking regions into pSMV3</u>                 |                                                                       |
| <i>ribA</i> Upstream Forward                                                                          | gcactcGGATCCATCACTCTCTGGCGGCGATCC                                     |
| <i>ribA</i> Upstream Reverse                                                                          | gcactcCTCGAGCGACATGACTTAACCTTAACGAC                                   |
| <i>ribA</i> Downstream Forward                                                                        | gcactcCTCGAGGAAGAGTAGTTTCAAGGCAATATATTTACCG                           |
| <i>ribA</i> Downstream Reverse                                                                        | gcactcGAGCTCCTAACATTAAGCTGCACACTAAATAGGG                              |
| <i>ribB</i> Upstream Forward                                                                          | gcactcGGATCCTATCGGCGTAATAGCTATGCTGATGCC                               |
| <i>ribB</i> Upstream Reverse                                                                          | gcactcCTCGAGCTGATTCATGGTTAATATCCTTCAAAAATACGACATGGG                   |
| <i>ribB</i> Downstream Forward                                                                        | gcactcCTCGAGGGCTAAATTTGGCCCCATAAACGGG                                 |
| <i>ribB</i> Downstream Reverse                                                                        | gcactcGAGCTCTAATGCTGAGGCTATCTGACAACAACATACG                           |
| <i>ribBX</i> Upstream Forward                                                                         | gcactcGGATCCGCTATTTAGGCAAAAGCTGTAATCAGGTGC                            |
| <i>ribBX</i> Upstream Reverse                                                                         | gcactcACTAGTCGCCATTGTAGGACCTTTATAATGTGACTGTTG                         |
| <i>ribBX</i> Downstream Forward                                                                       | gcactcACTAGTGCTGAGTAACAGGTTAAGCTTGAATAGGTTGCAC                        |
| <i>ribBX</i> Downstream Reverse                                                                       | gcactcGAGCTCAACAACTTATGGCTTTCATCCGCACCGAAAGC                          |
| <i>ribE-1</i> UpstreamForward                                                                         | gcatGGATCCACAGGGCTAACAAATAAGCCG                                       |
| <i>ribE-1</i> UpstreamReverse                                                                         | gcatACTAGTAGTAAACATTTTTTGGCTCGCTTATTCG                                |
| <i>ribE-1</i> Downstream Forward                                                                      | gcatACTAGTCTATCTTAATAAAAAGCCTAGTAAATTTGC                              |
| <i>ribE-1</i> Downstream Reverse                                                                      | gcatGCGGCCGCCACACGTAGGGCCACATGGTG                                     |
| <i>ribE-2</i> UpstreamForward                                                                         | gcatGGATCCGAGCCCCACGCTGAAGTGCATGCGC                                   |
| <i>ribE-2</i> UpstreamReverse                                                                         | gcatACTAGTAGTAAACATGGTTAACTCACTTATTCGC                                |
| <i>ribE-2</i> Downstream Forward                                                                      | gcatACTAGTGTGCGTTAGTACACTGGCACTC                                      |
| <i>ribE-2</i> Downstream Reverse                                                                      | gcatGAGCTCCTTGATCTTCCGCTTCAAAGGC                                      |
| <u>Complementation primer sets for cloning the indicated gene into pBBR1MCS-2 and / or pBBR1MCS-5</u> |                                                                       |
| <i>ribA</i> Forward                                                                                   | gcactcGAATTCTGGAATGAGAGTTGTCGTTAAGG                                   |
| <i>ribA</i> Reverse                                                                                   | gcactcGGATCCCTACTCTTCATCCGTAAAATGATAC                                 |
| <i>ribB</i> Forward                                                                                   | gcactcGAATTCCTCATGTCGATTTTTGAAGGATATTAACC                             |
| <i>ribB</i> Reverse                                                                                   | gcactcGGATCCTTAGCCTACGTTGGCCAATAAGGATTTACGG                           |
| <i>ribBX</i> Forward                                                                                  | gcactcGAATTCATAACAACAGTCACATTATAAAGGTCC                               |
| <i>ribBX</i> Reverse                                                                                  | gcactcGGATCCTTACTCAGCTACGCATTTCGGTCACTTCAAGGCC                        |
| <i>ribBX-NTD</i> Forward                                                                              | gcactcGAATTCATAACAACAGTCACATTATAAAGGTCC                               |
| <i>ribBX-NTD</i> Reverse                                                                              | gcactcGGATCCTTACACAACGGTCTTTCTTTGGTATTACGG                            |
| <i>ribBX-CTD</i> Forward                                                                              | gcactcGAATTCATAACAACAGTCACATTATAAAGGTCTACAATGAAAATCGGCACTATTGCGGCCCTG |
| <i>ribBX-CTD</i> Reverse                                                                              | gcactcGGATCCTTACTCAGCTACGCATTTCGGTCACTTCAAGGCC                        |
| <i>ribBA<sub>B5</sub></i> Forward                                                                     | gcatGAATTCATAACAACAGTCACATTATAAAGGTCTACAATGTTTCATCCGATAGAAGAAG CACTGG |
| <i>ribBA<sub>B5</sub></i> Reverse                                                                     | gcatGGATCCTTAGAAAATGAAGTAAATGACCTAGC                                  |
| <i>ribBA<sub>B5</sub>-NTD</i> Forward                                                                 | gcatGAATTCATAACAACAGTCACATTATAAAGGTCTACAATGTTTCATCCGATAGAAGAAGCACTGG  |
| <i>ribBA<sub>B5</sub>-NTD</i> Reverse                                                                 | gcatGGATCCTTACTCGACAAGTGTGTCAGATTGTAACGG                              |
| <i>ribBA<sub>B5</sub>-CTD</i> Forward                                                                 | gcatGAATTCATAACAACAGTCACATTATAAAGGTCTACAATGATCACCATTAAGGATTTGATTC     |
| <i>ribBA<sub>B5</sub>-CTD</i> Reverse                                                                 | gcatGGATCCTTAGAAAATGAAGTAAATGACCTAGC                                  |
| <i>ribE-1</i> Forward                                                                                 | gcactcGAATTCAGCCTTTAACGAATAAGCGAGC                                    |
| <i>ribE-1</i> Reverse                                                                                 | gcactcGGATCCTTAAAGATAGTCCGTTAAAACGTTTAGCC                             |
| <i>ribE-2</i> Forward                                                                                 | gcactcGAATTCCTATCTTTAGCGAATAAGTGAGTTAACC                              |
| <i>ribE-2</i> Reverse                                                                                 | gcactcGGATCCCTAACGCACAAAGCCAGCACGGGG                                  |
| VP_0618 Forward                                                                                       | gcacGAATTCACATTATAAAGGTCTACAATGCCAATCAGTACACCACAAG                    |
| VP_0681 Reverse                                                                                       | gcacGGATCCTTATTCGCAAACGTATTCAACCACG                                   |
| PP_0516 Forward                                                                                       | gcacGAATTCACATTATAAAGGTCTACAATGGCGCTCAACAGCATCGAAGAAC                 |
| PP_0516 Reverse                                                                                       | gcacGGATCCTCACTCGGAGGGCACGTATTCTAC                                    |
| PP3813 Forward                                                                                        | gcacGAATTCACATTATAAAGGTCTACAATGGCTTTCAACACCATCGAGGAAC                 |
| PP3813 Reverse                                                                                        | gcacGGATCCTCAGCCATCCATCCCCGGGTGCAACG                                  |

BcenP\_01000846 Forward      gcacGGATCCCCACATTATAAAGGTCCTACAATGACGCTCGCCTCCACGCTCGAC  
BcenP\_01000846 Reverse      gcacGAGCTCTTACGCGTGGGACGCCGGGCAGGAC

Primer sets for cloning the indicated gene as a *lexA* fusion in pSR658 and / or pSR659

*ribA* Forward      gcatCTCGAGATGTCGATAAAATATGTCGCG  
*ribA* Reverse      gcatGGTACCCTACTCTTCATCCGTAATG  
*ribB* Forward      gcatCTCGAGATGAATCAGTCTTTACTTGCTCC  
*ribB* Reverse      gcatGGTACCCTTAGCCTACGTTGGCCAATAAGG  
*ribBX* Forward      gcatCTCGAGATGGCGCTGCACAGTATAGAAG  
*ribBX* Reverse      gcatGGTACCCTTACTCAGCTACGCATTCGGTC  
*ribBX-NTD* Forward      gcatCTCGAGATGGCGCTGCACAGTATAGAAG  
*ribBX-NTD* Reverse      gcatGGTACCCTTACACAACGGTCGTTTCTTTGG  
*ribBX-CTD* Forward      gcatCTCGAGATGAAAATCGGCACTATTGCGG  
*ribBX-CTD* Reverse      gcatGGTACCCTTACTCAGCTACGCATTCGGTC  
*ribBA<sub>B5</sub>* Forward      gcatCTCGAGATGTTTCATCCGATAGAAGAAGCACTGG  
*ribBA<sub>B5</sub>* Reverse      gcatGGTACCCTTAGAAATGAAGTAAATGACCTAGC

---

\* - Restriction sites added by the oligonucleotide primer are underlined and nucleotides added to the 5' end to facilitate subsequent restriction digests are in lower case lettering. Nucleotides boxed in light grey are the *ribBX* leader region added by the oligonucleotide primer to facilitate translation. Nucleotides boxed in dark grey are start or stop codons that were added when necessary.
